# Supplementary material for: Oxidative Modification, Structural Conformation, and Gel Properties of Pork Paste Protein Mediated by Oxygen Concentration in Modified Atmosphere Packaging
Source: MDPI journal article supplement (doi:10.3390/foods13030391), 2024-01-25
Supplement: s1 [file s1]

**Table S1.** The average particle size of pork paste gels from minced meat before storage (Day 0) and after refrigerated storage for 5 days in modified atmosphere with different O<sub>2</sub> concentrations.

| Parameter                   | Day 0                         | 0%                            | 20%                           | 40%                           | 60%                           | 80%                            | P value |
|-----------------------------|-------------------------------|-------------------------------|-------------------------------|-------------------------------|-------------------------------|--------------------------------|---------|
| $D_{3,2}$ ( $\mu\text{m}$ ) | 20.70 $\pm$ 0.06 <sup>f</sup> | 26.03 $\pm$ 0.15 <sup>e</sup> | 27.67 $\pm$ 0.23 <sup>d</sup> | 29.77 $\pm$ 0.29 <sup>c</sup> | 31.60 $\pm$ 0.29 <sup>b</sup> | 48.67 $\pm$ 0.26 <sup>a</sup>  | <0.001  |
| $D_{4,3}$ ( $\mu\text{m}$ ) | 37.43 $\pm$ 0.41 <sup>e</sup> | 53.47 $\pm$ 1.18 <sup>d</sup> | 64.83 $\pm$ 2.37 <sup>c</sup> | 81.00 $\pm$ 0.17 <sup>b</sup> | 86.43 $\pm$ 2.20 <sup>b</sup> | 123.33 $\pm$ 2.85 <sup>a</sup> | <0.001  |

Note:  $D_{3,2}$  is the mean diameter in surface,  $D_{4,3}$  is the mean diameter in volume. Mean values  $\pm$  standard error. Different lowercase letters (<sup>a-f</sup>) in the same line indicated significant differences between treatment groups at  $p < 0.05$ .
